# Supplementary material for: Melamine Foam-Derived Carbon Scaffold for Dendrite-Free and Stable Zinc Metal Anode
Source: MDPI journal article supplement (doi:10.3390/molecules28041742), 2023-02-11
Supplement: s1 [file s1]

# Melamine Foam-Derived Carbon Scaffold for Dendrite-Free and Stable Zinc Metal Anode

Yong Liu <sup>1,2,\*</sup>, Feng Tao <sup>1,†</sup>, Yibo Xing <sup>1</sup>, Yifei Pei <sup>1</sup> and Fengzhang Ren <sup>1,3,\*</sup>

<sup>1</sup> School of Materials Science and Engineering, Provincial and Ministerial Co-Construction of Collaborative Innovation Center for Non-Ferrous Metal New Materials and Advanced Processing Technology, Henan University of Science and Technology, Luoyang 471023, China

<sup>2</sup> Science & Technology Innovation Center for Advanced Materials of Intelligent Equipment, Longmen Laboratory, Luoyang 471023, China

<sup>3</sup> Henan Key Laboratory of Non-Ferrous Materials Science & Processing Technology, School of Materials Science and Engineering, Henan University of Science and Technology, Luoyang 471023, China

\* Correspondence: liuyong209@haust.edu.cn (Y.L.); renfz@haust.edu.cn (F.R.)

† These authors contributed equally to this work.

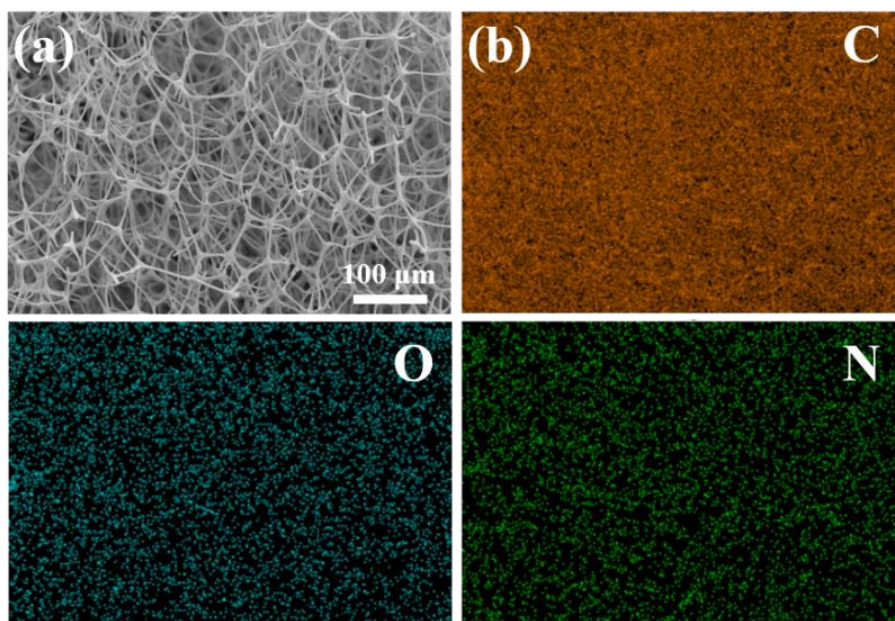

Figure S1. (a) SEM and (b) corresponding mapping images of CF.

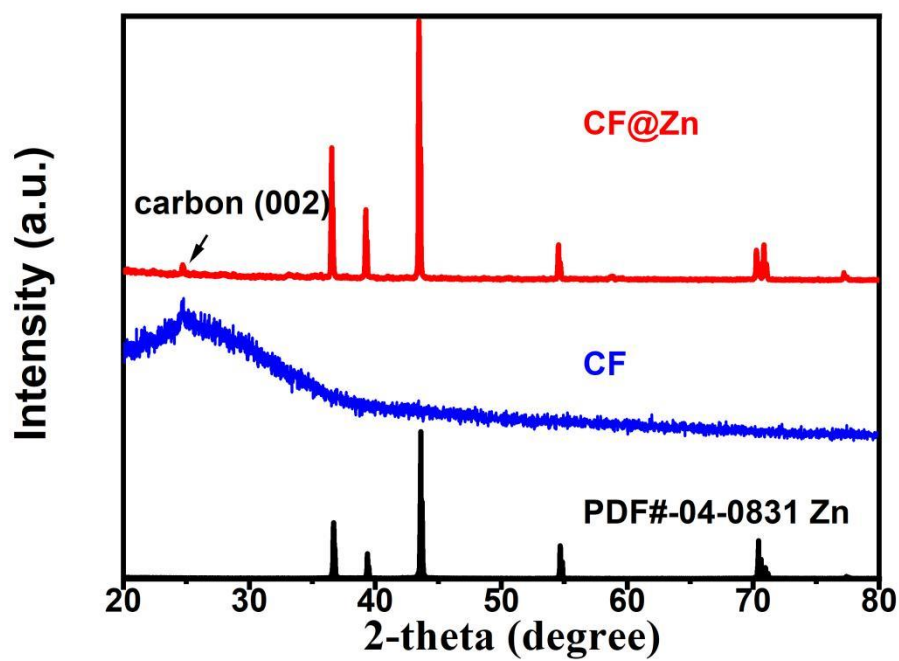

Figure S2. XRD patterns of pure CF and CF@Zn samples.

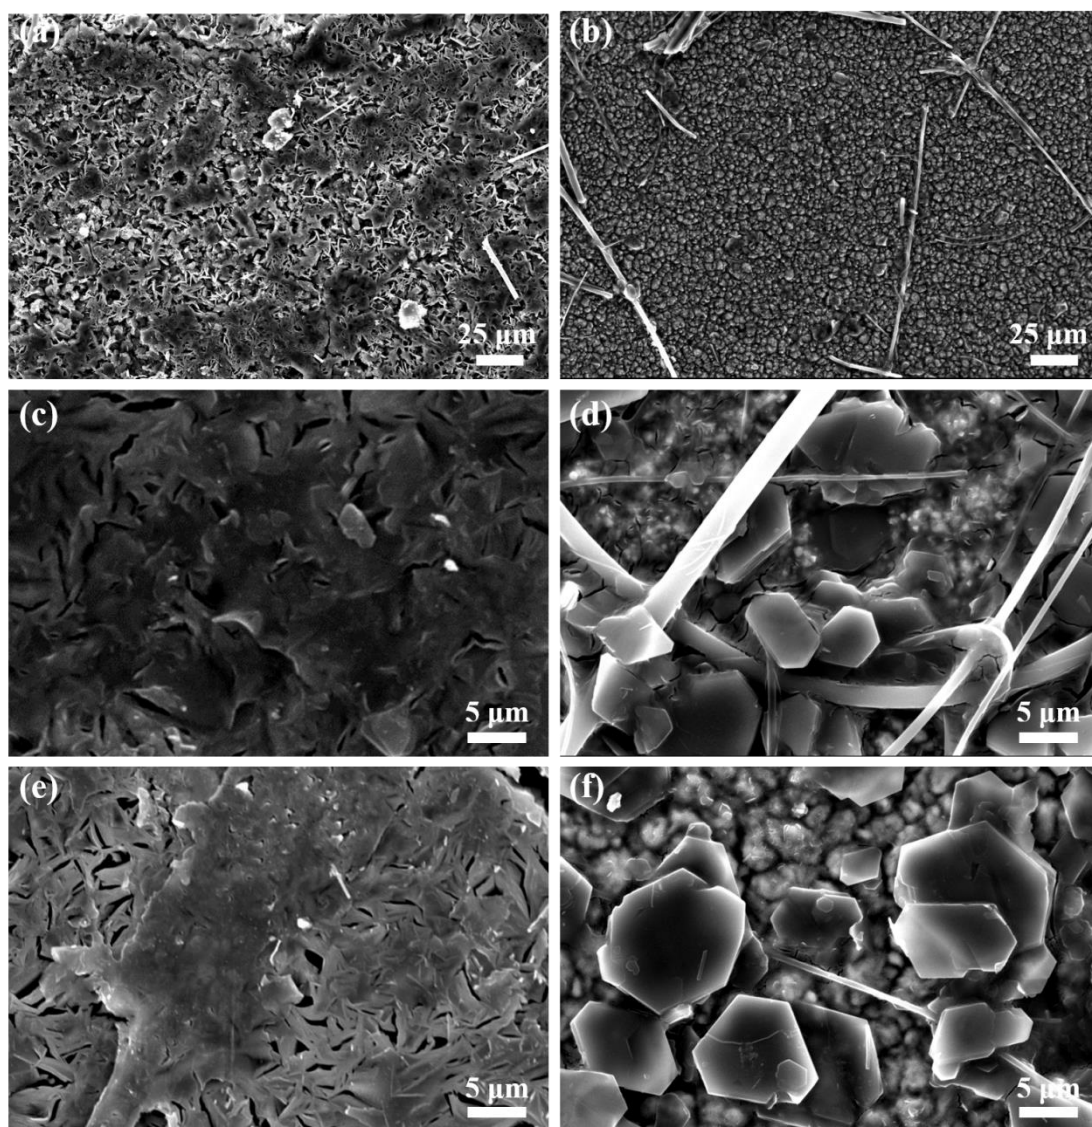

**Figure S3.** Scanning electron microscopy images of (a,c,e) CF and (b,d,f) Cu foil electrodes at the deposition current density of  $5 \text{ mA cm}^{-2}$  and deposition capacities of  $2 \text{ mAh cm}^{-2}$  with different cycles: (a) and (b) 20 cycles; (c) and (d) 50 cycles; (e) and (f) 80 cycles.

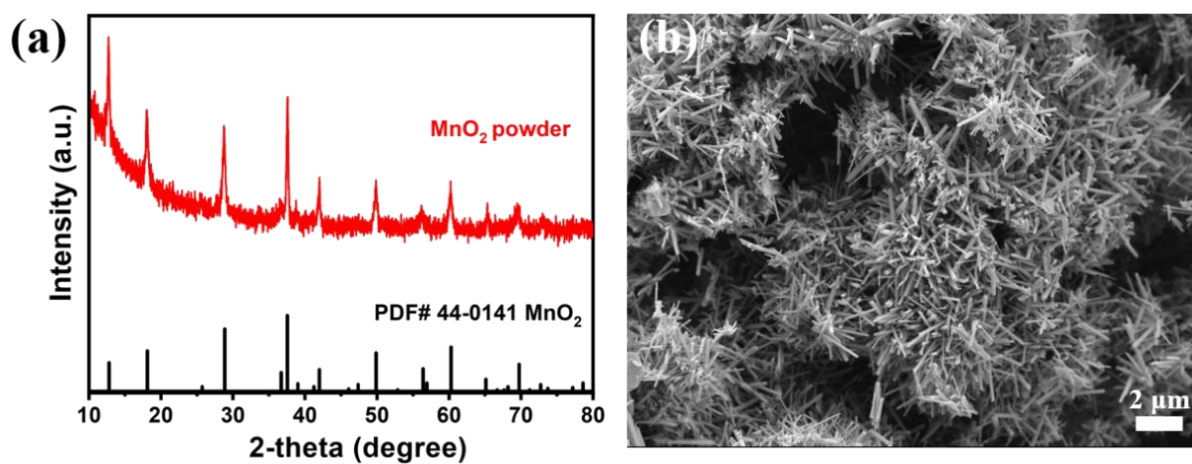

**Figure S4.** (a) XRD patterns and (b) SEM image of  $\alpha\text{-MnO}_2$ .



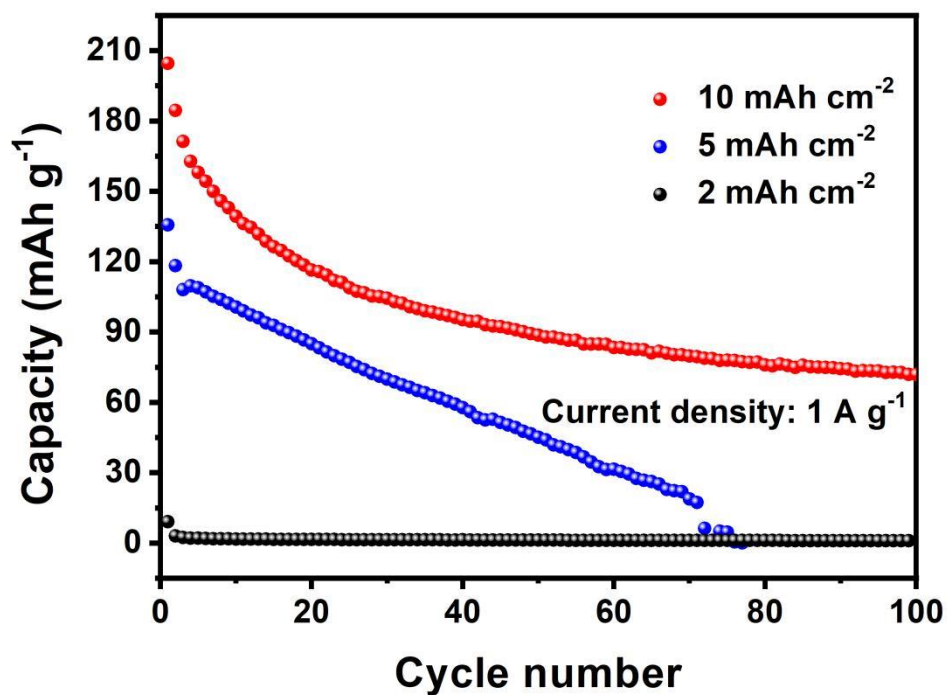

**Figure S5.** Cyclic performance of pre-deposited CF with different amounts of Zn ( $2 \text{ mAh cm}^{-2}$ ,  $5 \text{ mAh cm}^{-2}$  and  $10 \text{ mAh cm}^{-2}$ ) in full cells.

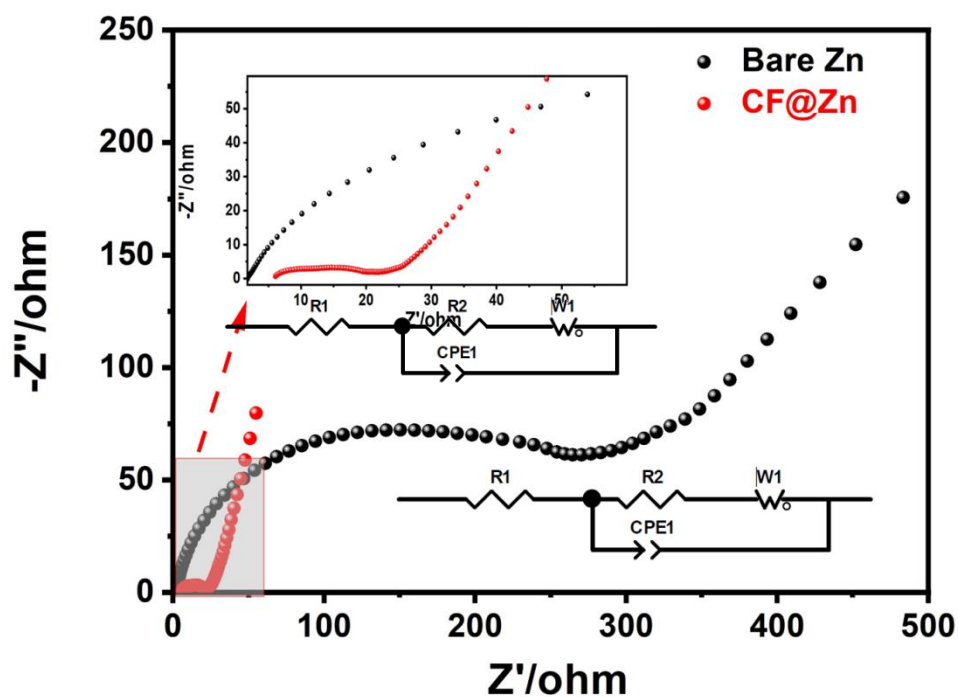

**Figure S6.** Nyquist plots of bare Zn and CF@Zn full cells at  $1 \text{ A g}^{-1}$  after 100 cycles (inset is the equivalent circuit).

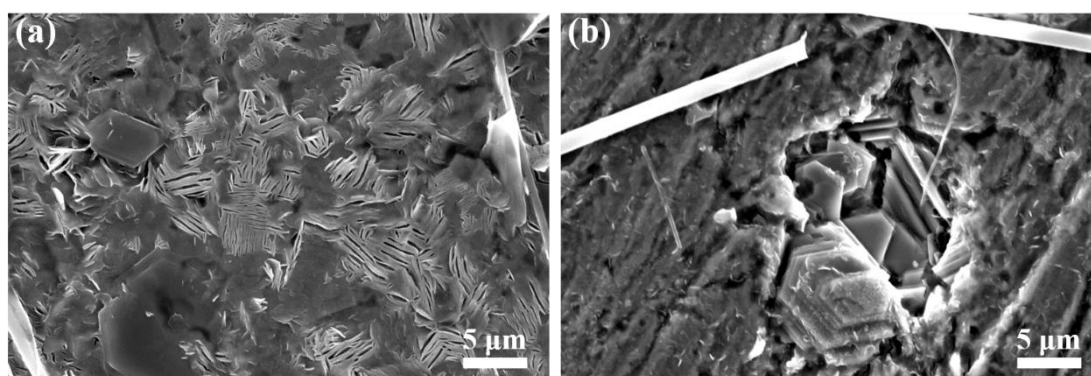

**Figure S7.** SEM images of a) CF@Zn and b) bare Zn anodes in full cells with  $\alpha$ -MnO<sub>2</sub> cathode after 100 cycles at 1 A g<sup>-1</sup>.

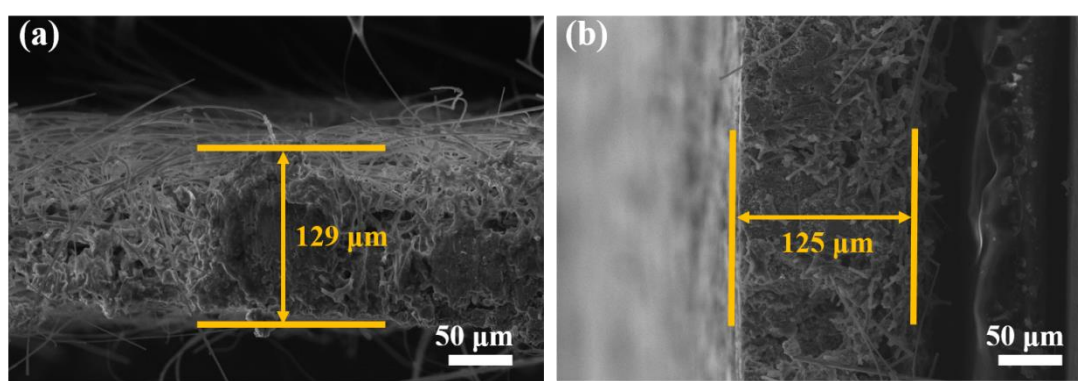

**Figure S8.** Cross-sectional view SEM images of a) CF@Zn and b) bare Zn anodes in full cells with  $\alpha$ -MnO<sub>2</sub> cathode after 100 cycles at 1 A g<sup>-1</sup>.

**Table S1.** A survey of zinc anodes with carbon-based hosts or modified by carbon-based materials and corresponding electrochemical properties.

| Zinc anodes                      | Current density (mA cm <sup>-2</sup> ) | Areal Capacity (mAh cm <sup>-2</sup> ) | Voltage hysteresis (V) | Worked time (h) | Reference |
|----------------------------------|----------------------------------------|----------------------------------------|------------------------|-----------------|-----------|
| rGO@Zn                           | 2                                      | 2                                      | 0.1                    | 200             | [37]      |
| graphite-coated Zn anode         | 0.1                                    | 0.1                                    | 0.028                  | 200             | [38]      |
| Zn/C <sub>3</sub> N <sub>4</sub> | 2                                      | 2                                      | /                      | 500             | [39]      |
| ZF@CB-NFC                        | 0.5                                    | 0.5                                    | 0.160                  | 400             | [40]      |
| CF@Zn                            | 1                                      | 1                                      | 0.032                  | 800             | This work |
|                                  | 2                                      | 1                                      | 0.047                  | 700             |           |
|                                  | 4                                      | 2                                      | 0.054                  | 500             |           |

**Table S2.** Different host materials for zinc metal anodes and the corresponding average CE value.

| Skeletons                                           | Current density (mA cm <sup>-2</sup> ) | Areal Capacity (mAh cm <sup>-2</sup> ) | Average Coulombic Efficiency | Reference |
|-----------------------------------------------------|----------------------------------------|----------------------------------------|------------------------------|-----------|
| Ti <sub>3</sub> C <sub>2</sub> T <sub>x</sub> MXene | 1                                      | 1                                      | 94.13%                       | [41]      |
| Graphite felt                                       | 1                                      | 1                                      | 96.5%                        | [42]      |
| Cu foil                                             | 5                                      | 2                                      | 83.1%                        | This work |
| CF                                                  | 5                                      | 2                                      | 93.25%                       | This work |

**Table S3.** The impedance parameters for full cells with  $\alpha$ -MnO<sub>2</sub> cathode before cycling.

| Anode | R <sub>s</sub> (Ω) | R <sub>ct</sub> (Ω) |
|-------|--------------------|---------------------|
| CF@Zn | 4.507              | 5.671               |
| Zn    | 5.145              | 102                 |

**Table S4.** The impedance parameters for full cells with  $\alpha$ -MnO<sub>2</sub> cathode at 1 A g<sup>−1</sup> after 100 cycles.

| Anode | R <sub>s</sub> (Ω) | R <sub>ct</sub> (Ω) |
|-------|--------------------|---------------------|
| CF@Zn | 4.61               | 15.86               |
| Zn    | 5.39               | 225.9               |

## References

37. Shen, C.; Li, X.; Li, N.; Xie, K.; Wang, J.-g.; Liu, X.; Wei, B. Graphene-Boosted, High-Performance Aqueous Zn-Ion Battery. *Acs Appl. Mater. Inter.* **2018**, *10*, 25446–25453, doi:10.1021/acsami.8b07781.
38. Li, Z.; Wu, L.; Dong, S.; Xu, T.; Li, S.; An, Y.; Jiang, J.; Zhang, X. Pencil Drawing Stable Interface for Reversible and Durable Aqueous Zinc-Ion Batteries. *Adv. Funct. Mater.* **2021**, *31*, 2006495, doi:10.1002/adfm.202006495.
39. Liu, P.; Zhang, Z.; Hao, R.; Huang, Y.; Liu, W.; Tan, Y.; Li, P.; Yan, J.; Liu, K. Ultra-highly stable zinc metal anode via 3D-printed g-C<sub>3</sub>N<sub>4</sub> modulating interface for long life energy storage systems. *Chem. Eng. J.* **2021**, *403*, 126425, doi:10.1016/j.cej.2020.126425.
40. Wang, A.; Zhou, W.; Huang, A.; Chen, M.; Chen, J.; Tian, Q.; Xu, J. Modifying the Zn anode with carbon black coating and nano-fibrillated cellulose binder: A strategy to realize dendrite-free Zn-MnO<sub>2</sub> batteries. *J. Colloid Interface Sci.* **2020**, *577*, 256–264, doi:10.1016/j.jcis.2020.05.102.
41. Tian, Y.; An, Y.; Wei, C.; Xi, B.; Xiong, S.; Feng, J.; Qian, Y. Flexible and Free-Standing Ti<sub>3</sub>C<sub>2</sub>T<sub>x</sub> MXene@Zn Paper for Dendrite-Free Aqueous Zinc Metal Batteries and Nonaqueous Lithium Metal Batteries. *ACS Nano* **2019**, *13*, 11676–11685, doi:10.1021/acs.nano.9b05599.
42. Wang, L.-P.; Li, N.-W.; Wang, T.-S.; Yin, Y.-X.; Guo, Y.-G.; Wang, C.-R. Conductive graphite fiber as a stable host for zinc metal anodes. *Electrochim. Acta* **2017**, *244*, 172–177, doi:10.1016/j.electacta.2017.05.072.
